# Supplementary material for: Is COVID-19 Keeping us Up at Night? Stress, Anxiety, and Sleep Among Adult Twins
Source: PubMed Central journal article supplement (PMC8107288; doi:10.3389/fnins.2021.665777), 2021-04-26
Supplement: Table_1.pdf [file Table_1.pdf]

Supplementary Table 1. Select demographic characteristics of individuals in the WSTR who completed a prior registry-wide survey and the current survey.

|                               |                                  | Prior survey | Current survey |
|-------------------------------|----------------------------------|--------------|----------------|
| <i>N</i>                      |                                  | 3,797        | 3,971          |
| Age                           |                                  | 49.2 ± 17.2  | 48.9 ± 17.3    |
| Gender                        | Men                              | 32%          | 31%            |
|                               | Women                            | 68%          | 69%            |
| Zygosity                      | MZ                               | 56%          | 60%            |
|                               | DZ                               | 44%          | 50%            |
| Race                          | White                            | 94           | 85             |
|                               | Black                            | 1.8          | 1.5            |
|                               | Asian                            | 3            | 2.7            |
|                               | American Indian/Alaska Native    | 1.4          | 1.6            |
|                               | Native Hawaiian/Pacific Islander | .6           | .6             |
|                               | Other                            | 1.8          | 2              |
| Household income <sup>1</sup> | < \$20,000                       | 5.2          | 6.1            |
|                               | \$20,000-\$29,999                | 4.7          | 4.7            |
|                               | \$30,000-\$39,999                | 5.2          | 6.1            |
|                               | \$40,000-\$49,999                | 6.1          | 6.7            |
|                               | \$50,000-\$59,999                | 6.9          | 6.9            |
|                               | \$60,000-\$69,999                | 6.2          | 6.2            |
|                               | \$70,000-\$79,999                | 6.6          | 6.2            |
|                               | \$80,000-\$89,999                | 16           | 21             |
|                               | \$90,000-\$99,999                | 4.5          | 3.4            |
|                               | \$100,000-\$149,999              | 14           | 12             |
| ≥\$150,000                    | 17                               | 13           |                |

MZ = monozygotic. DZ = dizygotic.

<sup>1</sup> Household income was not assessed in the current survey. The counts and frequencies presented here reflect the individuals' responses to the household income question in their prior survey for those who had completed a prior survey (2,479 individuals who completed the current survey also completed the prior survey).

*Note.* The prior survey was administered between July 2019 and February 2020; individuals who had been enrolled in the WSTR for at least two years as of July 1 2019 were invited to participate. Response rate was 32.7%. The current survey was administered between March 26 and April 5, 2020. Response rate was 32.6%. Means and standard deviations were presented for age; count and proportions were presented for the categorical variables.

Supplementary Table 2. Model fit differences comparing saturated twin models with nested models for change in sleep amount and sleep quality.

|                         |                        | <b>Saturated vs. equal thresholds</b> |      | <b>Equal thresholds vs. equal zygosity</b> |       |
|-------------------------|------------------------|---------------------------------------|------|--------------------------------------------|-------|
|                         |                        | Chi square difference                 | p    | Chi square difference                      | p     |
| Change in sleep amount  | No change vs. decrease | 2.237                                 | .327 | 2.605                                      | .457  |
|                         | No change vs. increase | .445                                  | .801 | 2.212                                      | .137  |
| Change in sleep quality | No change vs. decrease | .126                                  | .939 | 0                                          | 1.000 |
|                         | No change vs. increase | .057                                  | .972 | 1.660                                      | .198  |

Supplementary Table 3. Model fit differences comparing saturated twin models with nested models for anxiety and perceived stress.

|                  | Saturated vs. equal means |      | Equal means vs. equal means & variances |      | Equal means & variances vs. equal zygosity |      |
|------------------|---------------------------|------|-----------------------------------------|------|--------------------------------------------|------|
|                  | Chi square difference     | p    | Chi square difference                   | p    | Chi square difference                      | p    |
| Anxiety          | 7.10                      | .029 | 10.18                                   | .038 | 21.495                                     | .002 |
| Perceived stress | 10.73                     | .005 | 11.15                                   | .025 | 11.54                                      | .073 |
